# 1 **Pleiotropic enhancers are ubiquitous regulatory elements in the human genome**

2

3 Authors: Ian Laiker<sup>1</sup>, Nicolas Frankel<sup>1,2\*</sup>

4

5 <sup>1</sup>Instituto de Fisiología, Biología Molecular y Neurociencias (IFIBYNE), Consejo Nacional de  
6 Investigaciones Científicas y Técnicas (CONICET) y Universidad de Buenos Aires (UBA), Buenos Aires  
7 1428, Argentina.

8 <sup>2</sup>Departamento de Ecología, Genética y Evolución, Facultad de Ciencias Exactas y Naturales (FCEN),  
9 Universidad de Buenos Aires (UBA), Buenos Aires 1428, Argentina.

10

11 \*author for correspondence: nfrankel@conicet.gov.ar

## Abstract

Enhancers are regulatory elements of genomes that determine spatio-temporal patterns of gene expression. The human genome contains a vast number of enhancers, which largely outnumber protein-coding genes. Classically, enhancers have been regarded as highly tissue-specific. However, recent evidence suggests that many enhancers are pleiotropic, with activity in multiple developmental contexts. Yet, the extent and impact of pleiotropy remain largely unexplored. In this study we predicted active enhancers across human organs based on the analysis of both eRNA transcription (FANTOM5 consortium datasets) and chromatin architecture (ENCODE consortium datasets). We show that pleiotropic enhancers are pervasive in the human genome and that most enhancers active in a particular organ are also active in other organs. In addition, our analysis suggests that the proportion of context-specific enhancers of a given organ is explained, at least in part, by the proportion of context-specific genes in that same organ. The notion that such a high proportion of human enhancers can be pleiotropic suggests that small regions of regulatory DNA contain abundant regulatory information and that these regions evolve under important evolutionary constraints.

Keywords: human genome, non-coding DNA, gene regulation, CRE, enhancer, pleiotropy

## Significance statement

The human genome contains a vast number of regulatory elements, named enhancers, that control the tempo and mode of gene expression. Classically, enhancers have been regarded as genetic elements that are active in a single organ, but recent evidence suggests that many enhancers in animal genomes are active in multiple organs (i.e., are pleiotropic). Here we shed light on the architecture of non-coding human DNA by showing that a large percentage of the enhancers of the human genome are pleiotropic and that the majority of enhancers active in a particular organ are pleiotropic. This suggests that small regions of regulatory DNA may contain abundant regulatory information and that these regions evolve under important evolutionary constraints.

## 62 Introduction

63

64 Enhancers are regulatory elements of the genome, in general smaller than 1 kb, that determine  
 65 spatio-temporal patterns of gene expression (Levine 2010). Enhancers are activated and repressed  
 66 by the binding of transcription factors (TFs), which recognize specific motifs in the DNA named  
 67 transcription factor binding sites (TFBSs)(Hill et al. 2021). Upon activation, enhancers interact with  
 68 the basal transcriptional machinery at the core promoter, boosting mRNA synthesis of the target  
 69 gene(s)(Panigrahi & O'Malley 2021). There are several features that distinguish active enhancers: (i) it  
 70 has been shown that nucleosomes flanking active enhancers usually contain an acetyl group in  
 71 lysine 27 of histone H3 (H3K27ac) (Creyghton et al. 2010) and a single methyl group in lysine 4 of  
 72 histone H3 as well (H3K4me1)(Rada-Iglesias et al. 2011), which often coincides with the absence of  
 73 the trimethylated form of H3 lysine 4 (H3K4me3)(Lidschreiber et al. 2021), (ii) it has been  
 74 demonstrated that enhancer DNA may be transcribed bidirectionally, generating short capped non-  
 75 polyadenylated RNAs ('eRNAs')(Sartorelli & Lauberth 2020), and (iii) it is typically observed that  
 76 active enhancers are depleted of positioned nucleosomes, thus having a conformation that is known  
 77 as 'open chromatin' (Klemm et al. 2019). Together, these features can be used to identify enhancers  
 78 genome-wide (Kimura 2013; Kristjánssdóttir et al. 2020; Minnoye et al. 2021).

79 The human genome contains a vast number of enhancers, which largely outnumber protein-  
 80 coding genes (Pennacchio et al. 2013; Heintzman et al. 2009). It has been shown that a large  
 81 percentage of SNPs associated with human diseases fall within regions that are predicted to be  
 82 enhancers (Corradin & Scacheri 2014), and, in the same vein, numerous cases in which mutations in  
 83 enhancers cause disease have been reported (Smith & Shilatifard 2014). Although thousands of non-  
 84 coding regions have been identified as putative enhancers, very little is known about the function  
 85 of most of these predicted enhancers (Gasparini et al. 2020). Indeed, the complexity of enhancer  
 86 function in the human genome is just beginning to be comprehended. For example, recent studies  
 87 uncovered that enhancers usually regulate multiple genes and that many enhancers bypass their  
 88 nearest core-promoters to interact with distant core-promoters (Reilly et al. 2021; Nasser et al. 2021).

89 The fact that regulatory information within enhancer DNA can be dense and pleiotropic (Fuqua et al.  
90 2020; Kvon et al. 2020; Xin et al. 2020; Le Poul et al. 2020) also illustrates regulatory complexity.

91 The classic conception in which enhancers have strict tissue-specific activities (i.e., modular  
92 or context-specific activities) has been called into question by recent experimental data (Fuqua et al.  
93 2020; Infante et al. 2015; Lewis et al. 2019; Lonfat et al. 2014; Preger-Ben Noon et al. 2018; Xin et al.  
94 2020). Current evidence suggests that a large proportion of enhancers in vertebrate genomes are  
95 active in multiple developmental contexts (Kittelman et al. 2021; Sabarís et al. 2019), which  
96 probably means that a significant number of enhancers in the human genome are pleiotropic (i.e.,  
97 have roles in multiple organs and/or developmental stages). Although evidence suggest that  
98 pleiotropy in regulatory DNA is pervasive, the extent of enhancer pleiotropy in the human genome  
99 remains largely unexplored. In this sense, it would be useful to have a reliable estimate of the  
100 percentage of pleiotropic enhancers in the human genome and to explore the landscape of  
101 pleiotropy in each organ.

102 To assess the magnitude of pleiotropy in the regulatory genome, in this study we estimated  
103 the extent of enhancer reuse and analyzed the abundance of pleiotropic enhancers per organ. We  
104 show that pleiotropic enhancers are pervasive in the human genome and that the majority of  
105 enhancers active in a particular organ are also active in other organs. In addition, our analysis  
106 suggests that the proportion of context-specific enhancers of a given organ is explained, at least in  
107 part, by the proportion of context-specific genes in that same organ.

108

## 109 **Results**

110

111 *A large proportion of predicted human enhancers are pleiotropic*

112

113 We first set out to estimate the number of pleiotropic enhancers in the human genome by using  
114 information from the FANTOM5 (Andersson et al. 2014) and ENCODE (Dunham et al. 2012) projects.  
115 We grouped ENCODE and FANTOM biosamples into organs using UBERON anatomy ontology  
116 (Mungall et al. 2012) (see tables S1 and S2). For FANTOM5 data, putative enhancers were defined as

117 DNA regions transcribed bidirectionally above a certain threshold in at least one of 41 organs (see  
118 table S1 for a list of samples and organs). For ENCODE data, we defined putative enhancers as DNA  
119 regions with open chromatin that contain the epigenetic mark H3K27ac in at least one of 20 organs  
120 (see table S2 for a list of samples and organs). Although ENCODE and FANTOM5 predictions are  
121 derived from different biosamples and disparate genomic analyses, 40-60% of the FANTOM5  
122 enhancers are contained within the larger ENCODE enhancer set in 16 common organs (testis is an  
123 exception, see Figure S1). Also, we compared ENCODE enhancers with the 'ABC enhancer set', which  
124 was defined based on chromatin accessibility, the presence of the epigenetic mark H3K27ac and the  
125 interaction of the DNA region with core promoters (Fulco et al. 2019). We determined that, for 14  
126 common organs, the overlap between our enhancer set predicted with ENCODE data and ABC  
127 enhancers ranges between 43% and 83% (Figure S1). Altogether, comparisons between different  
128 enhancer sets suggest that most of our enhancer predictions based on ENCODE data are robust.

129 By intersecting genomic information from different organs we aimed to estimate the  
130 proportion of pleiotropic enhancers in the human genome. Hence, we considered that a pleiotropic  
131 FANTOM5 enhancer is a DNA region transcribed bidirectionally in two or more organs. For ENCODE  
132 data, we delimited consensus elements considering the different organs in which an enhancer was  
133 predicted to be active, based on the presence of open chromatin and the H3K27ac mark (see details  
134 of the pipeline in figure S2 and Materials and Methods, and figure S3 for the size distribution of  
135 consensus elements). In this case, we define a pleiotropic enhancer as a consensus element active in  
136 two or more organs. To evaluate how the proportion of pleiotropic enhancers changes with the  
137 number of organs considered we took combinations of organs from 2 to  $n$  out of the pool of ENCODE  
138 organs ( $n=20$ ) and FANTOM5 organs ( $n=41$ ) and calculated the proportion of enhancers active in 2  
139 or more organs. This approach allows us to comprehend how the proportion of pleiotropic  
140 enhancers changes depending on the number of organs considered and, at the same time, to  
141 validate our methods. We observed that the median of predicted pleiotropic enhancers increases  
142 monotonically with the number of intersected organs, both for FANTOM5 and ENCODE data (Figure  
143 1). Although enhancer sets predicted with ENCODE and FANTOM5 data are different (~50% of the  
144 FANTOM5 enhancer set is contained within the larger ENCODE enhancer set and, as well, the

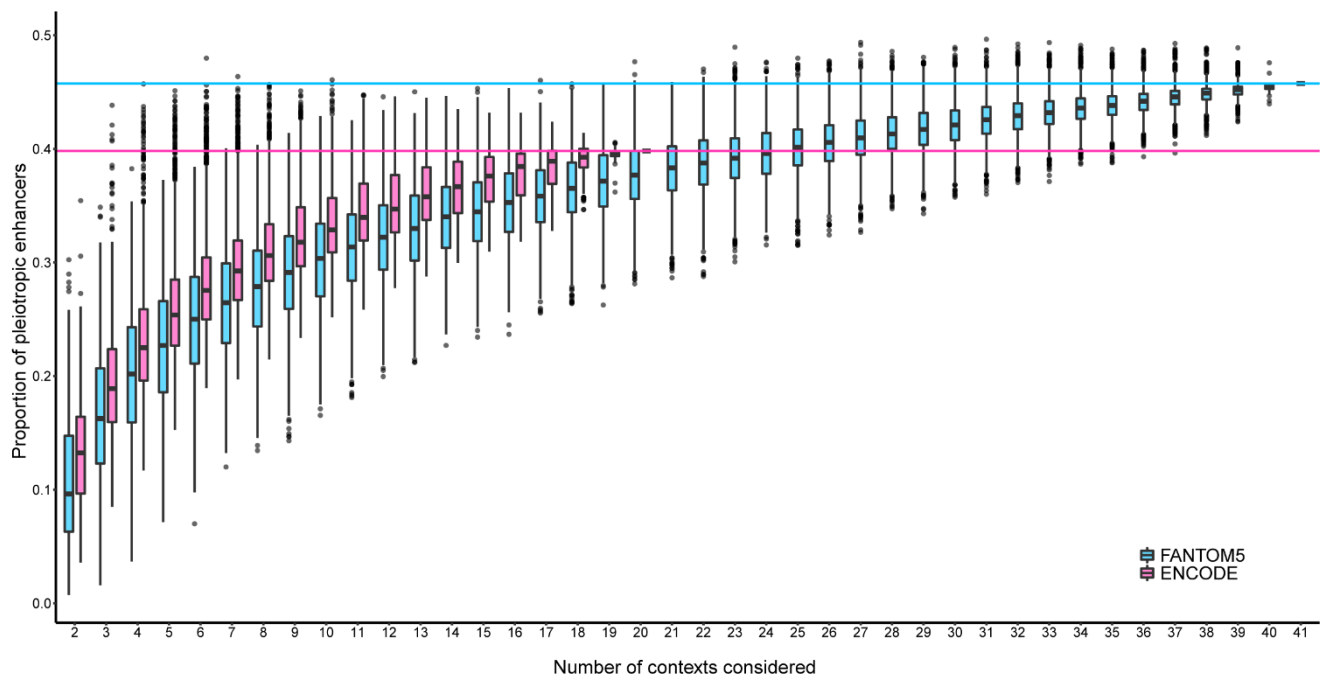

**Figure 1. A large proportion of predicted human enhancers are pleiotropic.** Proportion of pleiotropic enhancers as a function of the number of contexts considered in FANTOM5 (cyan) and ENCODE (magenta) enhancer sets. Boxplots indicate the median (horizontal line), interquartile range (box), observations within  $\pm 1.5 \times$  interquartile range (whiskers) and outliers (dots). The proportion of pleiotropic enhancers when considering all organs in a single comparison are marked with a magenta line (ENCODE) and a cyan line (FANTOM5). FANTOM5 enhancer set represents enhancers active in more organs than the ENCODE set) both the shape and the asymptote of the two hypothetical curves are remarkably similar (Figure 1). Furthermore, the implication that more than 40% of the predicted enhancers in the human genome are pleiotropic (active in at least two organs) is noteworthy as well (Figure 1).

Given that organs are comprised of different cell types and that some cell types are present in multiple organs (e.g., fibroblasts and endothelial cells), the high proportion of pleiotropic enhancers calculated with bulk organ data could be a mere consequence of considering enhancers that are active in cell types common to many organs. To rule out this possibility, we analyzed enhancers identified in primary cell cultures by the FANTOM5 project (Table S1) (Andersson et al. 2014), combining the same cell types from different organs as a single context (see Table S1). Notably, when considering these 39 distinct cell types, the percentage of pleiotropic enhancers turns out to be 68%. We performed the same analysis (Table S2) using distal enhancers (cCRE-dELS) defined by the ENCODE consortium in 17 cell types (Moore et al. 2020). When considering all 17 cell types, the

percentage of pleiotropic enhancers is 39%. In order to determine whether results from cells and organs are comparable, we contrasted the degree of pleiotropy of enhancers obtained with FANTOM5 cell types data with that calculated using FANTOM5 organ data (Figure S4). We observed that the degree of pleiotropy of enhancers estimated with cell types data and organ data is remarkably similar (Figure S4). Altogether, these data suggest that enhancer pleiotropy is mostly due to enhancers being active in different cell types of organs, rather than enhancers being active in the same cell type present in multiple organs.

*Most enhancers active in a particular organ are pleiotropic*

Next, we sought to explore the abundance of pleiotropic enhancers in the different organs. To this end, we calculated the proportion of predicted pleiotropic enhancers per organ in the FANTOM5 and ENCODE data sets (Figure 2). We observed values ranging from 43.6% to 98.1% in FANTOM5 organs (Figure 2A, table S3) and from 53.4% to 96.8% in ENCODE organs (Figure 2B, table S3). These data suggest that most enhancers active in a given organ are also active in one or more other organs. Indeed, most of the pleiotropic enhancers active in a given organ are active in more than two organs (Figure 2).



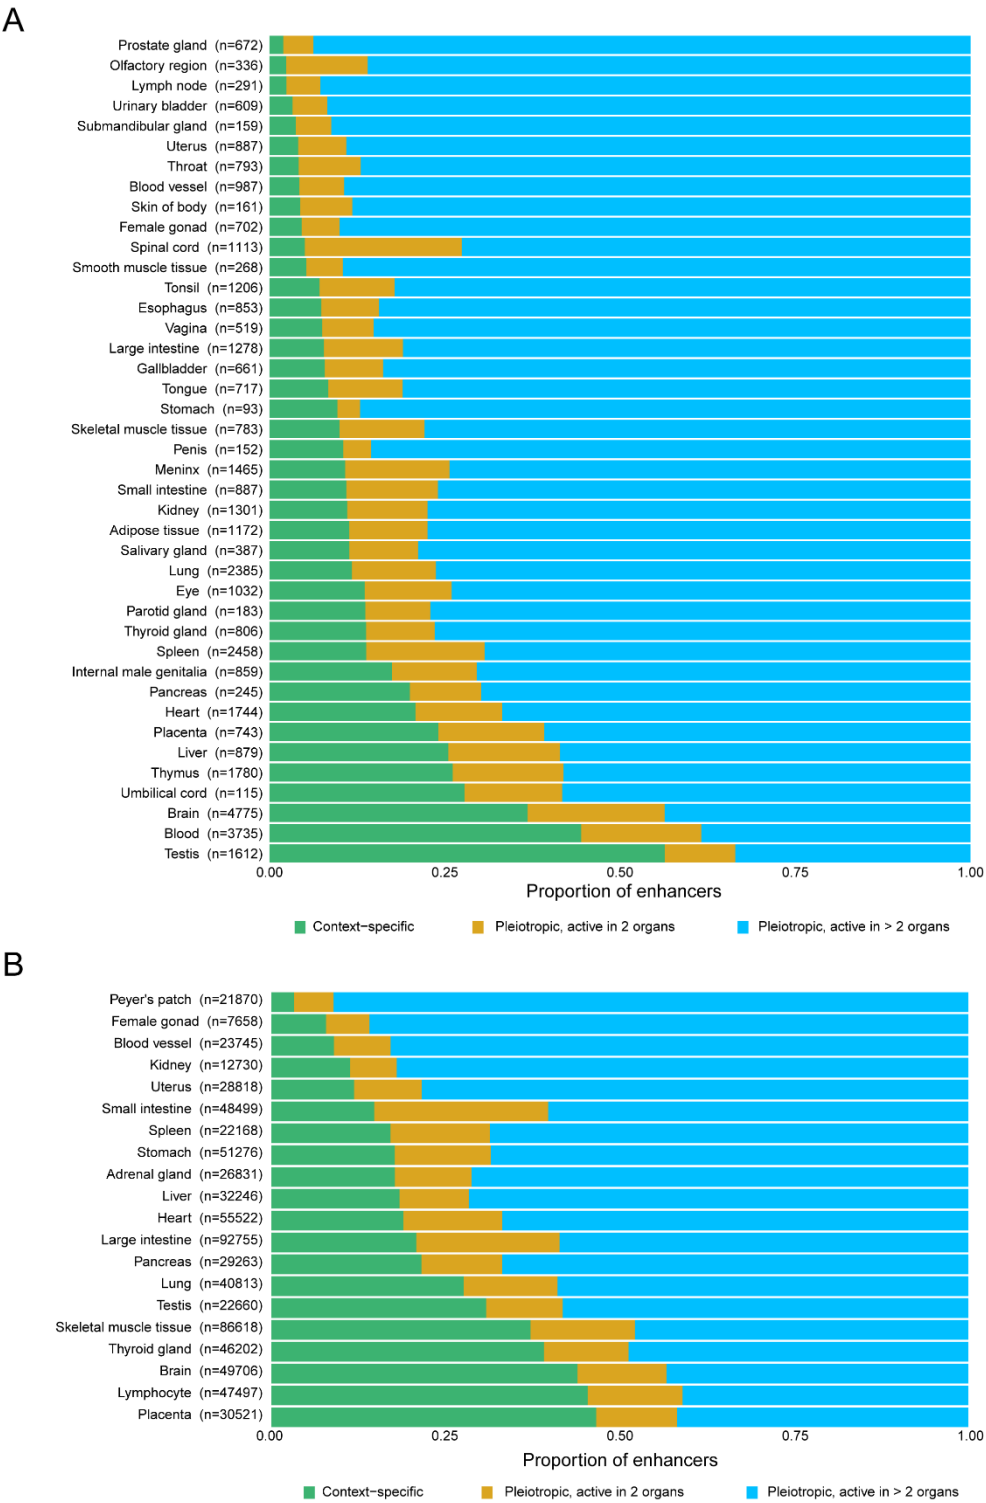

**Figure 2. The majority of active enhancers in a particular organ are pleiotropic.** Proportion of context-specific enhancers (green), pleiotropic enhancers active in 2 organs (orange) and pleiotropic enhancers active in more than 2 organs (blue) in FANTOM5 (A) and ENCODE (B) organs. The number of predicted enhancers per organ is indicated beside the name of each organ.

Given that 17 organs are shared between FANTOM5 and ENCODE datasets, we compared the estimations of the proportion of predicted pleiotropic enhancers for both analyses. We observed that they are notably concordant, especially considering that biosamples are derived from different parts of the organ and different individuals, and that enhancers were predicted through distinct methods (see Table S3). For most comparisons the difference in the estimation of the proportion of pleiotropic enhancers is smaller than 10%. However, testis is an outlier, with a difference of more than 20%. Despite differences in the estimation of the proportion of pleiotropic enhancers for testis, both FANTOM5 and ENCODE data indicate that this organ is rich in context-specific enhancers (Figure 2). Since it has been reported that testis is the organ with the most context-specific genes (Djureinovic et al. 2014; Pineau et al. 2019; Zhu et al. 2016), we reasoned that a possible cause for the high number of context-specific enhancers in the testis could be the high number of testis-specific genes and, moreover, that there could be a relationship between the number of context-specific genes and the abundance of context-specific enhancers per organ. To test this hypothesis, we computed the number of organ-specific genes in ENCODE and FANTOM5 organs (with RNA-seq and transcribed TSSs data respectively, see Materials and Methods for details) and, subsequently, we looked for a possible correlation between the proportion of organ-specific genes and the proportion of organ-specific enhancers. Remarkably, for both FANTOM5 and ENCODE organs, we found a positive correlation (Pearson's  $r=0.653$ ,  $p<0.001$  and Pearson's  $r=0.647$ ,  $p<0.001$ , respectively) between the proportion of context-specific genes and the proportion of context-specific enhancers (Figure 3). A positive correlation is also observed when using data from FANTOM5 cell types (Pearson's  $r=0.71$ ,  $p<0.001$ ).

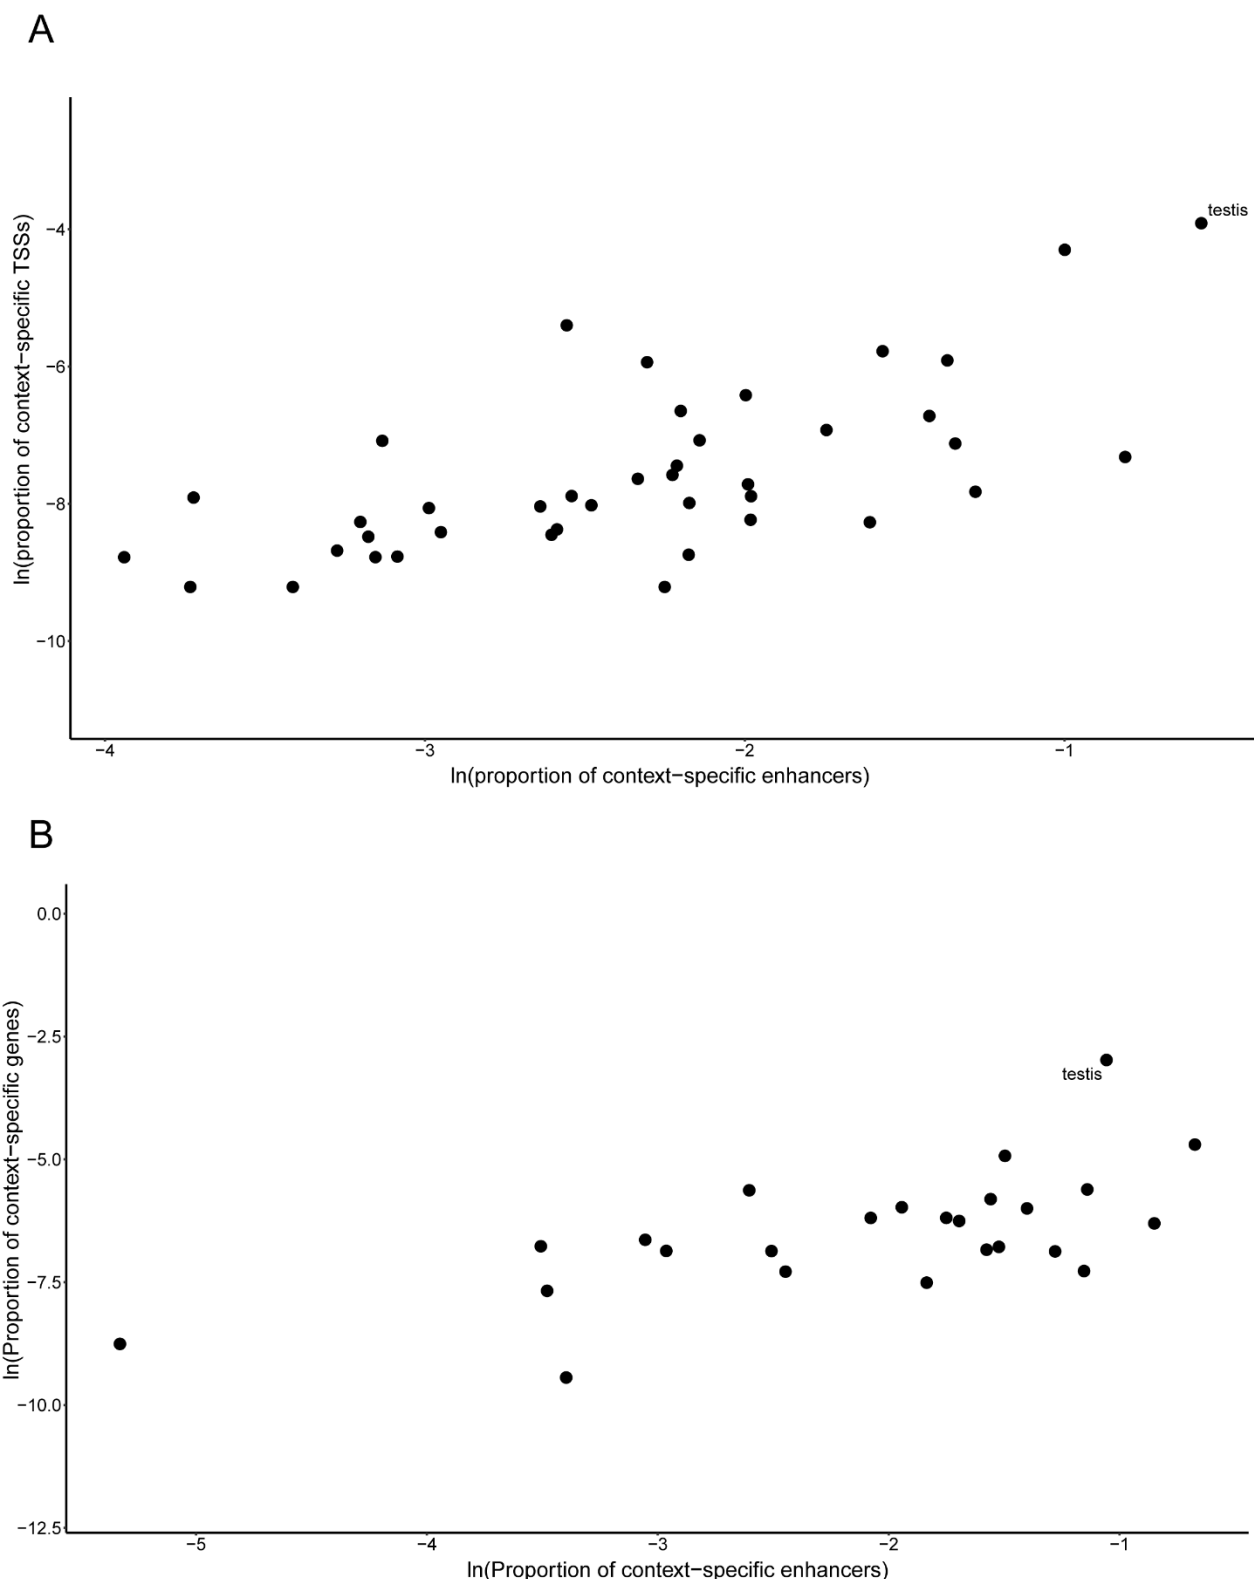

**Figure 3. The proportion of context-specific enhancers is positively correlated with the proportion of context-specific genes.** (A) Relationship between the proportion of context-specific enhancers and context-specific TSSs for the FANTOM5 dataset. Active TSSs were defined in each organ by comparing transcription levels against genomic background (see Materials and Methods for details). (B) Relationship between the proportion of context-specific enhancers and context-specific genes for the ENCODE dataset. An expression threshold was used to define expressed genes in each organ (see Materials and Methods for details).

## 233 *Pleiotropic enhancers are enriched in SNPs with high regulatory potential*

234

235 Bearing in mind the fact that pleiotropic enhancers have more density of TF binding motifs (Fish et  
236 al. 2017; Singh & Yi 2021), we reasoned that a way to provide a functional validation for the  
237 pleiotropic function of enhancers was to analyze a possible connection between the degree of  
238 pleiotropy of enhancers and the abundance of genetic variants related to gene regulation. Thus, we  
239 interrogated the Regulome database (Boyle et al. 2012), which provides a means to predict the  
240 regulatory potential of SNPs across the genome. In this approach, SNPs are given a score based on  
241 their likelihood of being variants with regulatory function (see Materials and Methods for details).  
242 Hence, we quantified the enrichment of SNPs with predicted regulatory activity that fall within  
243 enhancers in different categories of pleiotropy. We noted that there is a positive relationship  
244 between the degree of pleiotropy of enhancers and the level of enrichment in SNPs with predicted  
245 regulatory function (Figure 4). When using only SNPs in the most stringent category of Regulome  
246 database (category 1a: SNPs that (i) are eQTLs, (ii) match TF motifs, (iii) match DNase footprints, (iv)  
247 lie within DNase peaks and (v) lie within TF binding peaks) the positive relationship holds, and the  
248 enrichment becomes even larger (Figure S5).

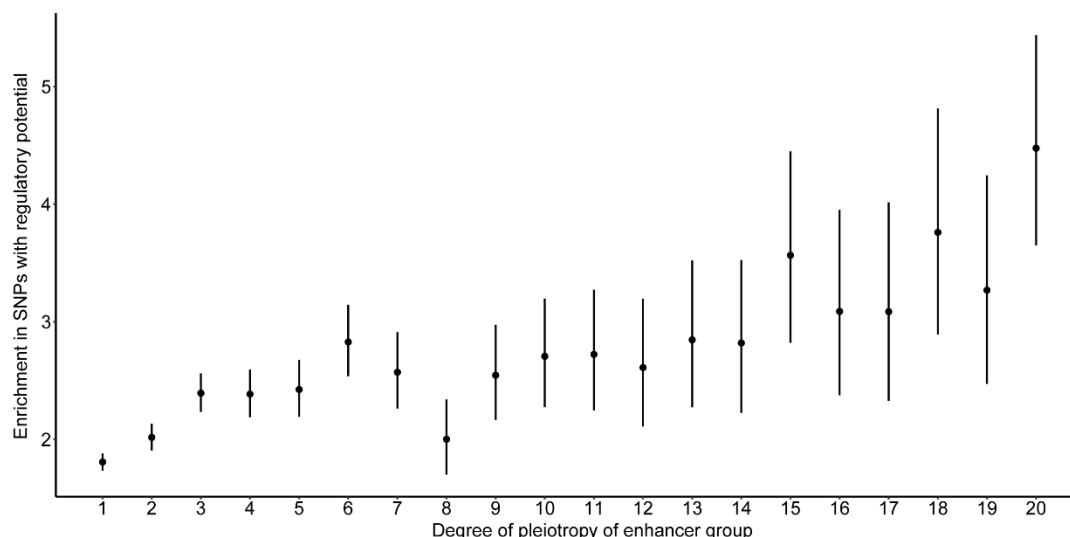

249

250 **Figure 4. Pleiotropic enhancers are enriched in SNPs with high regulatory potential.** The degree of pleiotropy of  
251 ENCODE enhancers is positively correlated with the enrichment in SNPs with high regulatory potential (category 1 SNPs  
252 of Regulome DB). Black circles represent the odds ratio and bars represent the 95% CI. Enrichments (odds-ratios) were  
253 calculated using common SNPs as background (see Materials and Methods for details).

254

## 255 Discussion

256

257 In this study, we predicted active enhancers across human organs by analyzing different  
 258 types of genomic data. Enhancer predictions were based on either the analysis of eRNA transcription  
 259 (FANTOM5 enhancers) or the analysis of chromatin architecture (ENCODE enhancers). Remarkably,  
 260 although these two enhancer sets are different and are derived from different data types, their make-  
 261 ups are highly similar, which provides a solid basis for our conclusions. Our data suggest that more  
 262 than 40% of the enhancers in the human genome are pleiotropic. We argue that 40% is a minimum  
 263 estimation because we mostly considered adult organs (we included just a few fetal biosamples) and  
 264 because we cannot identify enhancers that are active in a single organ but regulating more than one  
 265 gene (these context-specific enhancers are pleiotropic as well). However, it is also conceivable that  
 266 using bulk data from organs imposes a bias in the identification of pleiotropic enhancers. To evaluate  
 267 this possibility, we calculated the percentage of pleiotropic enhancers using primary cells instead of  
 268 organs. Notably, the percentage of pleiotropic enhancers calculated with cells is similar, or even  
 269 larger, than the percentage obtained with organs. Hence, it is unlikely that the estimation of the  
 270 percentage of pleiotropic enhancers in organs is inflated by the contribution of the same cell types  
 271 present in multiple organs (e.g., fibroblasts).

272 A further analysis of the abundance of context-specific versus pleiotropic enhancers per  
 273 organ uncovered that there is a wide variability in the proportion of context-specific enhancers per  
 274 organ, and that the majority of active enhancers in a particular organ are pleiotropic. Furthermore,  
 275 when trying to comprehend the variability in the proportion of context-specific enhancers among  
 276 organs, we showed that this proportion might be partly explained by the occurrence of context-  
 277 specific genes in that same organ.

278 Altogether, the analysis of ENCODE and FANTOM5 enhancers suggests that pleiotropic  
 279 enhancers are ubiquitous regulatory elements in the human genome. The notion that such a high  
 280 proportion of human enhancers can be pleiotropic suggests that small regions of regulatory DNA  
 281 may contain abundant regulatory information and that these regions evolve under important

evolutionary constraints, as was previously observed for some mammalian (Fish et al. 2017; Hiller et al. 2012) and human (Radke et al. 2021) pleiotropic enhancers.

Previous studies determined that pleiotropic enhancers have more density and diversity of TF binding motifs (Fish et al. 2017; Singh & Yi 2021). Clearly, this pattern makes sense, since it is logical to expect an increase in the number of TFBSs when more expression patterns are encoded within an enhancer. Investigating the possible regulatory function of SNPs within our enhancer pleiotropy categories, we found that the number of SNPs with regulatory potential increases with the degree of pleiotropy of the enhancer, implying that the more pleiotropic an enhancer is, the more regulatory information that enhancer contains. This finding confirms the suitability of our pleiotropy categories.

Although our data indicate that pleiotropic enhancers regulate gene expression in multiple organs, they do not enlighten the mechanisms underlying pleiotropic function. Pleiotropic enhancers may harbor distinct sets of TFBSs for driving gene expression in different organs. Alternatively, the same TFBSs within pleiotropic enhancers might be needed to regulate gene expression in multiple organs (i.e., pleiotropic enhancers bearing pleiotropic TFBSs). Indeed, a recent study showed that pleiotropic SNPs regulate the expression of *IRX3/IRX5* genes in adipose and brain tissue of humans and mice (Sobreira et al. 2021). Furthermore, a comparative analysis of the genetic architecture of hundreds of human complex traits also provides evidence for the existence of pleiotropic SNPs in enhancers of the human genome (Watanabe et al. 2019). Undoubtedly, this and other issues related to the structure and function of pleiotropic enhancers remain to be studied in detail.

## Materials and Methods

### *The FANTOM5 enhancer set*

The FANTOM5 enhancer set was downloaded as a binary matrix from <https://enhancer.binf.ku.dk/presets>. Of all the available biosamples, 139 were mapped to 41 organs (Table S1) based on UBERON ontology terms, as described in Andersson et al. 2014. The FANTOM5 enhancers were identified in each biosample as bidirectional transcribed loci that are expressed

significantly above genomic background and that are distal from known TSSs and exons of protein coding genes. These elements were subsequently filtered to remove directionally biased elements (those with a higher level of transcription in one of the DNA strands), which often correspond to TSSs of protein-coding genes. We eliminated from this set of consensus elements those that overlap with regions that are in the ENCODE blacklist of the hg19 assembly (<https://github.com/Boyle-Lab/Blacklist>). In total, we kept 14814 putative enhancer elements. A subset of these elements has been validated with reporter constructs in HeLa cells (Andersson et al. 2014). Enhancers were considered active in an organ if they were active in at least one of the biosamples that comprise the organ. Enhancers included in the pleiotropy category  $n$  were those predicted to be active in  $n$  organs. The size distribution of FANTOM5 enhancers is shown in figure S2.

320

### 321 *Generation of the ENCODE enhancer set and definition of pleiotropic enhancers*

For generating the ENCODE enhancer set we used high quality DNase-seq and H3K27ac ChIP-seq data from 37 tissues from the ENCODE Project. We downloaded alignment files in bam format for DNase-seq data (see table S4 for details) and peak files in bed narrowPeak format for H3K27ac ChIP-seq data (see table S5 for details) from <https://www.encodeproject.org>. For each DNase-seq experiment, we called peaks with MACS2 (Zhang et al. 2008) with `--min-size 50 -q 0.01 -f BAMPE` for paired-end experiments and `--min-size 50 -q 0.01 -f BAM --extsize 200` for single-end experiments. Since the precise location and width of a given accessibility peak may vary between tissues and technical replicates of the same tissue, we developed a method for merging elements from different tissues by searching for overlaps between the summits of accessible elements rather than overlaps between whole elements. To achieve this, we constructed summit confidence intervals for each element in each tissue by using the variability in the position of summits of the same accessible element on the different replicates. Firstly, for each tissue with replicates we estimated the signal-to-noise ratio (SNR) by calculating the proportion of reads inside peaks (analogous to the Fraction of Reads in Peaks score for ATAC-seq) with featureCounts (Liao et al. 2014) using the following parameters: `--p --countReadPairs` for paired-end experiments and default parameters for single-end experiments. We then intersected the highest SNR experiment MACS2 called peaks with the available

H3K27ac peaks for the same tissue (when multiple replicates of H3K27ac ChIP-seq experiments where available, we used only those H3K27ac peaks represented in more than half of the replicates). We then intersected these DNase-H3K27ac peaks with the DNase-seq peaks of the other replicates with bedmap (Neph et al. 2012) using parameters --fraction-either 0.5 and created a gappedPeak file with a custom-made R script that represents the positions of the summits of the same element in the different replicates. DNase-H3K27ac peaks only present in the highest SNR file were not included in subsequent analyses. We called intervals in gappedPeak files 'summit confidence intervals'. Summits of tissues with only one DNase-seq were only considered if the element overlapped with H3K27ac peaks in that same tissue. By overlapping the summit confidence intervals between tissues, we created 'summit clusters' present in multiple tissues. We created consensus elements by merging all the accessible elements (MACS2 peaks) that contribute to each summit cluster. Consensus elements overlapping by more than 80% of the sequence were merged. The 37 ENCODE tissues were mapped to 19 UBERON organs and one cell ontology category (Lymphocyte; CL:0000542) (Table S2). Enhancers active in an organ are consensus elements predicted to be active in at least one of the tissues that comprise that organ. With these data we constructed a binary matrix in which rows represent consensus elements and columns represent organs. Pleiotropic enhancers were defined as consensus elements predicted to be active in 2 or more organs. The code generated to create the consensus elements from DNase-seq and H3K27ac ChIP-seq data can be found at [https://github.com/frankel-lab/human\\_pleiotropic\\_enhancers](https://github.com/frankel-lab/human_pleiotropic_enhancers). We eliminated from this set of consensus elements those that overlap with regions that are in the ENCODE blacklist of the hg38 assembly (<https://github.com/Boyle-Lab/Blacklist>), those that are located at less than 500 bp from annotated transcription start sites and those that overlap exons (including putative enhancers that overlap exons does not affect the analyses, data not shown). The final set of putative enhancers consisted of 334189 elements.

362

### 363 *Comparisons between FANTOM5, ENCODE and ABC enhancer sets*

364 The ABC enhancer set was downloaded from <https://www.engreitzlab.org/resources>. We mapped  
365 the biological samples to the corresponding UBERON organs (Table S6) in order to compare with



FANTOM5 and ENCODE enhancers. ABC enhancer regions overlapping by more than 80% were merged with bedtools (Quinlan & Hall 2010). In total, we used 176220 ABC elements. FANTOM5 and ABC enhancers were lifted to the hg38 human genome assembly with UCSC liftOver (<https://genome.ucsc.edu/cgi-bin/hgLiftOver>) for comparing with the coordinates of the ENCODE enhancers. The overlap fraction was calculated by intersecting enhancers active in each organ (comparing two enhancers sets) and then dividing by the size of the smaller set (Table S7).

### *Calculation of the percentage of pleiotropic enhancers*

To evaluate how the proportion of pleiotropic enhancers changes with the number of organs considered we took all possible combinations of organs from 2 to  $n$ , where  $n$  is the total number of organs (20 for the ENCODE enhancers and 41 for the FANTOM5 enhancers) and calculated the proportion of enhancers active in 2 or more organs. For  $k$  organs, there exists  $n$  choose  $k$  combinations of organs. For  $k$  values with more than 2000 combinations, we estimated the distribution of the proportion of pleiotropic enhancers with 2000 randomly chosen sets of size  $k$  (without repetition).

We calculated the proportion of pleiotropic enhancers (cCRE-dELS) for 17 cell types (Table S2). The ENCODE cCRE-dELS ( $n=290876$ ) in these cells were defined by Moore et al (2020). We explicitly excluded from the analysis data stemming from cancer derived cell lines. We also calculated the proportion of pleiotropic enhancers in 39 cell types (69 primary cell cultures were combined to form 39 different cell types, see table S1)(Andersson et al. 2014). For comparing the degree of pleiotropy of enhancers in cell types and organs we analyzed the 11400 enhancers that were detected as active in both cell types and organs (Andersson et al. 2014).

### *Correlation between the proportion of organ-specific enhancers and organ-specific TSSs/transcripts*

For FANTOM5 enhancers, we used the same CAGE-seq libraries that were used to identify enhancers to estimate the proportion of context-specific TSSs (reads that correspond to first exons of genes). We used the RefSeq curated gene set (ncbiRefSeqCurated, assembly hg19) from the UCSC site (<https://genome.ucsc.edu/>). We extended each TSS 100 bp in both directions and merged

overlapping elements that were on the same DNA strand with bedtools (Quinlan & Hall 2010) (we obtained similar results without merging, data not shown). We obtained a total of 25797 extended TSSs. For each biosample, we counted CAGE-seq reads overlapping extended TSSs in a strand-specific manner with featureCounts and compared the counts of each TSS with the count distribution of 1477250 random genomic elements of the same size (we excluded exons and TSSs from GRCh38 and all the ENCODE and FANTOM5 enhancers from this random genomic elements) generated with bedtools. We computed an empirical p value for each TSS in each biosample as the fraction of random elements with the same or greater number of reads than the TSS in that biosample. We corrected these empirical p values with the Benjamini-Hochberg procedure and considered that a TSS is active in a biosample if its corrected p value was 0.01 or less (we obtained similar results using thresholds of  $p < 0.005$  or  $p < 0.001$ ; data not shown). For ENCODE enhancers we used ENCODE RNA-seq data available for 25 of the 37 tissues that were used to create the enhancer set (Table S8). We downloaded FPKM normalized counts and only kept genes with protein products annotated by the HUGO Gene Nomenclature Committee (19167 genes). When replicates of the same tissues were available, we used the median FPKM for each gene. In order to use a uniform threshold across tissues to decide when a gene is expressed or not, we used the zFPKM R package (Hart et al. 2013) to normalize FPKM. Genes were considered to be expressed if their zFPKM was above -2 (we obtained similar results using -3.5, -3, -2.5, -1, 0 and 1 as thresholds; data not shown). We regard a gene as context-specific when the gene is expressed in a single organ (for both the FANTOM5 and ENCODE analyses).

414

#### 415 *RegulomeDB SNP analysis*

SNPs with regulatory potential were downloaded from the RegulomeDB site (<https://regulomedb.org/files/TSTFF344324>). We lifted the hg19 positions to the hg38 assembly using UCSC liftOver. For this analysis we considered SNPs in category 1 (SNPs that are eQTLs and that have at least one additional source of evidence for being regulatory) and the most stringent category of RegulomeDB, which is category 1a (Boyle et al. 2012). Odds ratios were calculated for each pleiotropy category as the RegulomeDB SNPs contained in the category divided by the non-

RegulomeDB SNPs (1000 Genomes SNPs with a MAF > 0.05 in Europeans) in that same category divided by the same ratio for the rest of the genome. In total we considered 71263 SNPs in category 1 and 978 SNPs in category 1a, and 7894464 common variants. All SNP count operations were performed with bedmap.

426

## 427 **Acknowledgments**

428

We thank Justin Crocker, Hernan Dopazo and members of the Frankel lab for helpful comments on the manuscript. This work was supported by grants PICT 2016-0414 and PICT 2019-00497 (ANPCyT, Argentina) to NF.

432

## 433 **Competing interests**

The authors have no competing interests to declare

435

## 436 **Data availability statement**

The data underlying this article are available in the article and in its online supplementary material.

438

## 439 **References**

440

- Andersson R et al. 2014. An atlas of active enhancers across human cell types and tissues. *Nature*. 507:455–461. doi: 10.1038/nature12787.
- Boyle AP et al. 2012. Annotation of functional variation in personal genomes using RegulomeDB. *Genome Res*. 22:1790–1797. doi: 10.1101/gr.137323.112.
- Corradin O, Scacheri PC. 2014. Enhancer variants: Evaluating functions in common disease. *Genome Med*. 6:1–14. doi: 10.1186/s13073-014-0085-3.
- Creyghton MP et al. 2010. Histone H3K27ac separates active from poised enhancers and predicts developmental state. *Proc. Natl. Acad. Sci. U. S. A.* 107:21931–21936. doi: 10.1073/pnas.1016071107.
- Djureinovic D et al. 2014. The human testis-specific proteome defined by transcriptomics and

antibody-based profiling. *Mol. Hum. Reprod.* 20:476–488. doi: 10.1093/molehr/gau018.

Dunham I et al. 2012. An integrated encyclopedia of DNA elements in the human genome. *Nature.* 489:57–74. doi: 10.1038/nature11247.

Fish A, Chen L, Capra JA. 2017. Gene regulatory enhancers with evolutionarily conserved activity are more pleiotropic than those with species-specific activity. *Genome Biol. Evol.* 9:2615–2625. doi: 10.1093/gbe/evx194.

Fulco CP et al. 2019. Activity-by-contact model of enhancer–promoter regulation from thousands of CRISPR perturbations. *Nat. Genet.* 51:1664–1669. doi: 10.1038/s41588-019-0538-0.

Fuqua T et al. 2020. Dense and pleiotropic regulatory information in a developmental enhancer. *Nature.* 587:235–239. doi: 10.1038/s41586-020-2816-5.

Gasparini M, Tome JM, Shendure J. 2020. Towards a comprehensive catalogue of validated and target-linked human enhancers. *Nat. Rev. Genet.* 21:292–310. doi: 10.1038/s41576-019-0209-0.

Hart T, HK K, S L, K P, DR S. 2013. Finding the active genes in deep RNA-seq gene expression studies. *BMC Genomics.* 14. doi: 10.1186/1471-2164-14-778.

Heintzman ND et al. 2009. Histone modifications at human enhancers reflect global cell-type-specific gene expression. *Nature.* 459:108–112. doi: 10.1038/nature07829.

Hill MS, Vande Zande P, Wittkopp PJ. 2021. Molecular and evolutionary processes generating variation in gene expression. *Nat. Rev. Genet.* 22:203–215. doi: 10.1038/s41576-020-00304-w.

Hiller M, Schaar B, Bejerano G. 2012. Hundreds of conserved non-coding genomic regions are independently lost in mammals. *Nucleic Acids Res.* 40:11463–11476. doi: 10.1093/NAR/GKS905.

Infante CR et al. 2015. Shared Enhancer Activity in the Limbs and Phallus and Functional Divergence of a Limb-Genital cis-Regulatory Element in Snakes. *Dev. Cell.* 35:107–119. doi: 10.1016/j.devcel.2015.09.003.

Kimura H. 2013. Histone modifications for human epigenome analysis. *J. Hum. Genet.* 58:439–445. doi: 10.1038/jhg.2013.66.

Kittelmann S, Preger-Ben Noon E, McGregor AP, Frankel N. 2021. A complex gene regulatory architecture underlies the development and evolution of cuticle morphology in *Drosophila*. *Curr. Opin. Genet. Dev.* 69:21–27. doi: 10.1016/j.gde.2021.01.003.

478 Klemm SL, Shipony Z, Greenleaf WJ. 2019. Chromatin accessibility and the regulatory epigenome.  
479 Nat. Rev. Genet. 20:207–220. doi: 10.1038/s41576-018-0089-8.

480 Kristjánsdóttir K, Dziubek A, Kang HM, Kwak H. 2020. Population-scale study of eRNA transcription  
481 reveals bipartite functional enhancer architecture. Nat. Commun. 11:1–12. doi: 10.1038/s41467-  
482 020-19829-z.

483 Kvon EZ et al. 2020. Comprehensive In Vivo Interrogation Reveals Phenotypic Impact of Human  
484 Enhancer Variants. Cell. 180:1262–1271.e15. doi: 10.1016/j.cell.2020.02.031.

485 Levine M. 2010. Transcriptional enhancers in animal development and evolution. Curr. Biol.  
486 20:R754–63. doi: 10.1016/j.cub.2010.06.070.

487 Lewis JJ et al. 2019. Parallel evolution of ancient, pleiotropic enhancers underlies butterfly wing  
488 pattern mimicry. Proc. Natl. Acad. Sci. U. S. A. 116:24174–24183. doi: 10.1073/pnas.1907068116.

489 Liao Y, GK S, W S. 2014. featureCounts: an efficient general purpose program for assigning sequence  
490 reads to genomic features. Bioinformatics. 30:923–930. doi: 10.1093/BIOINFORMATICS/BTT656.

491 Lidschreiber K et al. 2021. Transcriptionally active enhancers in human cancer cells. Mol. Syst. Biol.  
492 17. doi: 10.15252/msb.20209873.

493 Lonfat N, Montavon T, Darbellay F, Gitto S, Duboule D. 2014. Convergent evolution of complex  
494 regulatory landscapes and pleiotropy at Hox loci. Science (80-. ). 346:1004–1006. doi:  
495 10.1126/science.1257493.

496 Minnoye L et al. 2021. Chromatin accessibility profiling methods. Nat. Rev. Methods Prim. 1:1–24.  
497 doi: 10.1038/s43586-020-00008-9.

498 Moore JE et al. 2020. Expanded encyclopaedias of DNA elements in the human and mouse  
499 genomes. Nat. 2020 5837818. 583:699–710. doi: 10.1038/s41586-020-2493-4.

500 Mungall CJ, C T, GV G, SE L, MA H. 2012. Uberon, an integrative multi-species anatomy ontology.  
501 Genome Biol. 13. doi: 10.1186/GB-2012-13-1-R5.

502 Nasser J et al. 2021. Genome-wide enhancer maps link risk variants to disease genes. Nat. 2021  
503 5937858. 593:238–243. doi: 10.1038/s41586-021-03446-x.

504 Neph S et al. 2012. BEDOPS: high-performance genomic feature operations. Bioinformatics.  
505 28:1919. doi: 10.1093/BIOINFORMATICS/BTS277.

506 Panigrahi A, O'Malley BW. 2021. Mechanisms of enhancer action: the known and the unknown.  
 507 Genome Biol. 22:1–30. doi: 10.1186/s13059-021-02322-1.

508 Pennacchio LA, Bickmore W, Dean A, Nobrega MA, Bejerano G. 2013. Enhancers: Five essential  
 509 questions. Nat. Rev. Genet. 14:288–295. doi: 10.1038/nrg3458.

510 Pineau C et al. 2019. Cell Type-Specific Expression of Testis Elevated Genes Based on  
 511 Transcriptomics and Antibody-Based Proteomics. J. Proteome Res. 18:4215–4230. doi:  
 512 10.1021/acs.jproteome.9b00351.

513 Le Poul Y et al. 2020. Regulatory encoding of quantitative variation in spatial activity of a  
 514 Drosophila enhancer. Sci. Adv. 6:eabe2955. doi: 10.1126/sciadv.abe2955.

515 Preger-Ben Noon E et al. 2018. Comprehensive Analysis of a cis-Regulatory Region Reveals  
 516 Pleiotropy in Enhancer Function. Cell Rep. 22:3021–3031. doi: 10.1016/j.celrep.2018.02.073.

517 Quinlan AR, Hall IM. 2010. BEDTools: a flexible suite of utilities for comparing genomic features.  
 518 Bioinformatics. 26:841–842. doi: 10.1093/BIOINFORMATICS/BTQ033.

519 Rada-Iglesias A et al. 2011. A unique chromatin signature uncovers early developmental enhancers  
 520 in humans. Nature. 470:279–285. doi: 10.1038/nature09692.

521 Radke DW et al. 2021. Purifying selection on noncoding deletions of human regulatory loci  
 522 detected using their cellular pleiotropy. Genome Res. 31:935–946. doi: 10.1101/GR.275263.121.

523 Reilly SK et al. 2021. Direct characterization of cis-regulatory elements and functional dissection of  
 524 complex genetic associations using HCR–FlowFISH. Nat. Genet. 2021 538. 53:1166–1176. doi:  
 525 10.1038/s41588-021-00900-4.

526 Sabarís G, Laiker I, Preger-Ben Noon E, Frankel N. 2019. Actors with Multiple Roles: Pleiotropic  
 527 Enhancers and the Paradigm of Enhancer Modularity. Trends Genet. 35:423–433. doi:  
 528 10.1016/j.tig.2019.03.006.

529 Sartorelli V, Lauberth SM. 2020. Enhancer RNAs are an important regulatory layer of the epigenome.  
 530 Nat. Struct. Mol. Biol. 27:521–528. doi: 10.1038/s41594-020-0446-0.

531 Singh D, Yi S. 2021. Enhancer Pleiotropy, Gene Expression, and the Architecture of Human  
 532 Enhancer-Gene Interactions. Mol. Biol. Evol. 38:3898–3909. doi: 10.1093/MOLBEV/MSAB085.

533 Smith E, Shilatifard A. 2014. Enhancer biology and enhanceropathies. Nat. Struct. Mol. Biol. 21:210–

534 219. doi: 10.1038/nsmb.2784.

535 Sobreira DR et al. 2021. Extensive pleiotropism and allelic heterogeneity mediate metabolic effects  
536 of IRX3 and IRX5. *Science* (80-. ). 372:1085–1091. doi: 10.1126/SCIENCE.ABF1008.

537 Watanabe K et al. 2019. A global overview of pleiotropy and genetic architecture in complex traits.  
538 *Nat. Genet.* 2019 519. 51:1339–1348. doi: 10.1038/s41588-019-0481-0.

539 Xin Y et al. 2020. Ancestral and derived transcriptional enhancers share regulatory sequence and a  
540 pleiotropic site affecting chromatin accessibility. *Proc. Natl. Acad. Sci. U. S. A.* 117:20636–20644. doi:  
541 10.1073/pnas.2004003117.

542 Zhang Y et al. 2008. Model-based Analysis of ChIP-Seq (MACS). *Genome Biol.* 2008 99. 9:1–9. doi:  
543 10.1186/GB-2008-9-9-R137.

544 Zhu J et al. 2016. Identification of Tissue-Specific Protein-Coding and Noncoding Transcripts across  
545 14 Human Tissues Using RNA-seq. *Sci. Rep.* 6:1–11. doi: 10.1038/srep28400.
